# Supplementary material
Source: publisher figshare collection journal article supplement (https://springernature.figshare.com/ndownloader/files/23720771)
Supplement: Supplementary file 1 [file 23720771]

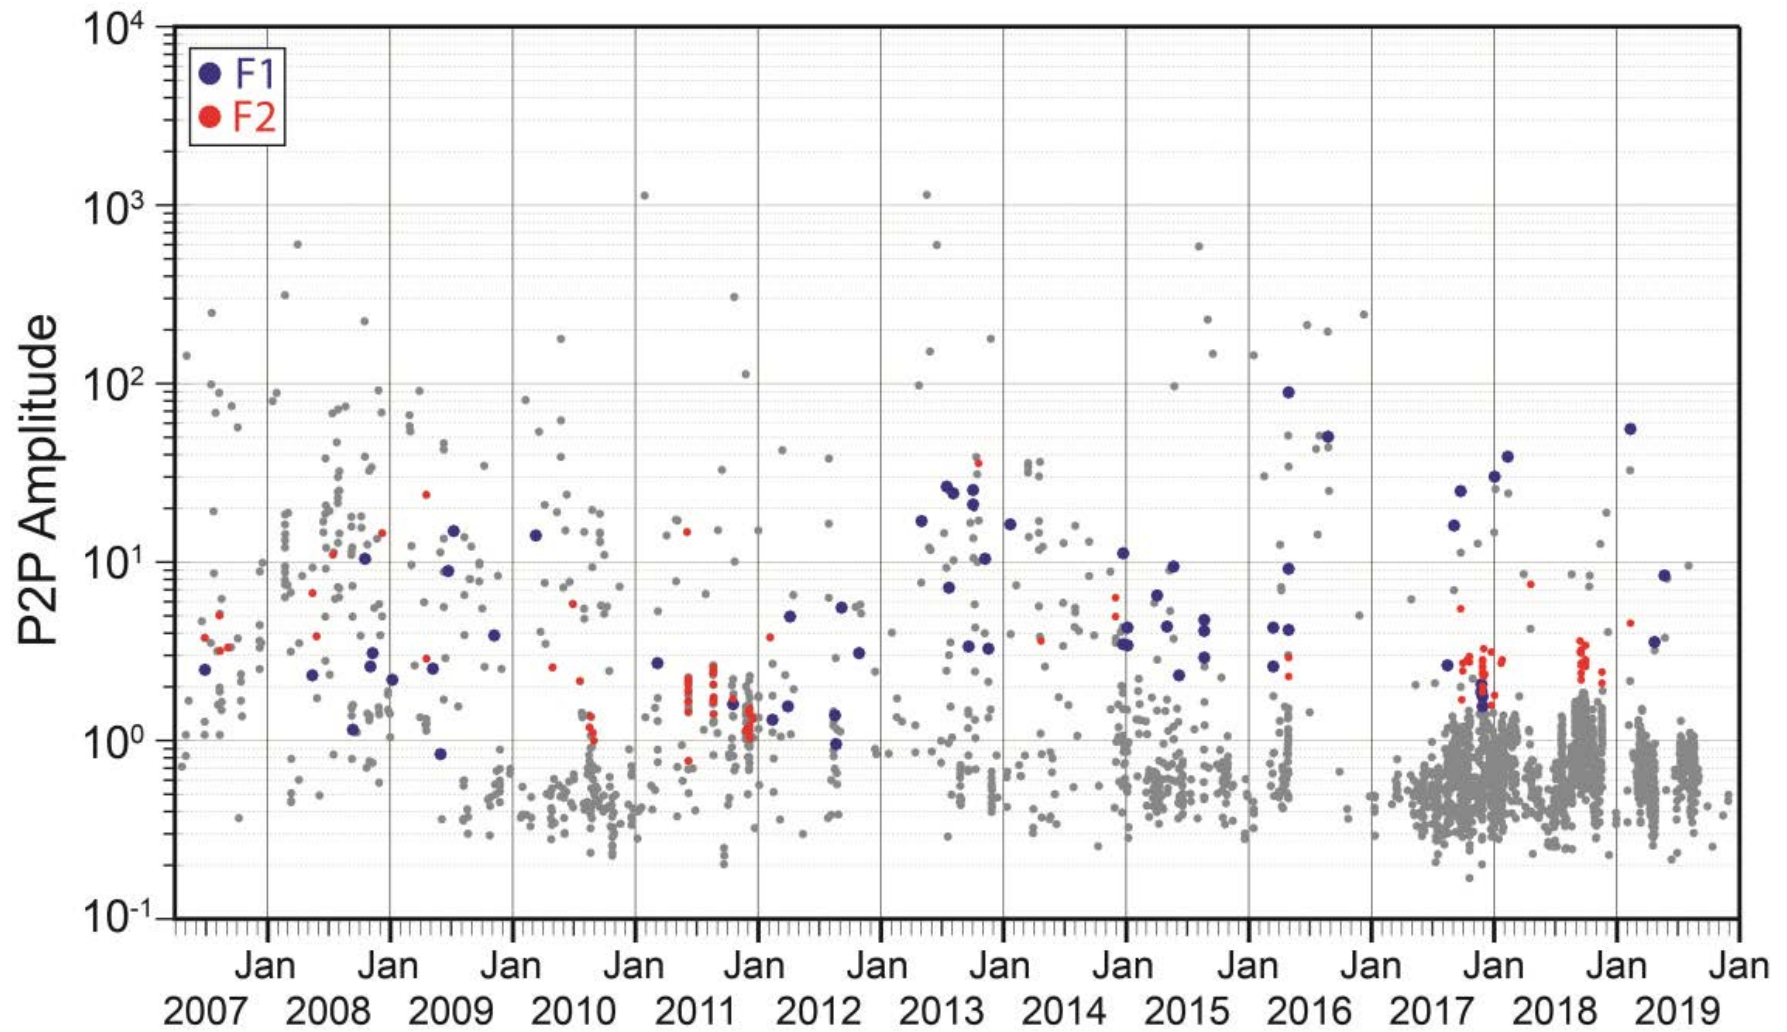

Additional file 3. Template matching results (gray dots) without semblance and SNR filtering. This catalogue includes two families (F1 and F2) as well as teleseismic data and lower SNR events. The vertical axis is peak-to-peak (P2P) amplitude ( $\mu\text{m/s}$ ) computed using the vertical component of WIZ station.
